# Supplementary material for: Risk Factors for Severe COVID-19 in Children
Source: Oxford University Press journal article supplement (doi:10.1542/peds.2021-053418), 2021-10-22
Supplement: peds_2021053418supplementarydata.pdf [file peds_2021053418supplementarydata.pdf]

## Supplemental Information

**SUPPLEMENTAL TABLE 4** Demographic Characteristics of Children Ages <18 Years Hospitalized with SARS-CoV-2 Infection Included Versus Excluded from the Analysis: COVID-NET, March 2020 to May 2021

|                                                             | Pediatric Hospitalizations Excluded From Analysis ( <i>n</i> = 813) |      | Pediatric Hospitalizations Included in Analysis ( <i>n</i> = 2293) |      |
|-------------------------------------------------------------|---------------------------------------------------------------------|------|--------------------------------------------------------------------|------|
|                                                             | <i>n</i>                                                            | %    | <i>n</i>                                                           | %    |
| Reason for exclusion                                        |                                                                     |      |                                                                    |      |
| Incomplete chart abstraction                                | 81                                                                  | 10.0 | 0                                                                  | 0.0  |
| Currently pregnant on admission                             | 127                                                                 | 15.9 | 0                                                                  | 0.0  |
| Unknown outcome                                             | 15                                                                  | 0.5  | 0                                                                  | 0.0  |
| Primary reason for admission not likely related to COVID-19 | 718                                                                 | 23.1 | 0                                                                  | 0.0  |
| OB or labor and delivery                                    | 162                                                                 | 19.9 | 0                                                                  | 0.0  |
| Inpatient surgery or procedure                              | 118                                                                 | 14.5 | 0                                                                  | 0.0  |
| Psychiatric admissions                                      | 270                                                                 | 33.2 | 0                                                                  | 0.0  |
| Trauma                                                      | 136                                                                 | 16.7 | 0                                                                  | 0.0  |
| Other, missing or unknown                                   | 92                                                                  | 11.3 | 0                                                                  | 0.0  |
| Demographic characteristics                                 |                                                                     |      |                                                                    |      |
| Age, median and IQR, y                                      | 14                                                                  | 9–16 | 7                                                                  | 1–14 |
| Age group                                                   |                                                                     |      |                                                                    |      |
| <6 mo                                                       | 84                                                                  | 10.3 | 450                                                                | 19.6 |
| 6–23 mo                                                     | 33                                                                  | 4.1  | 295                                                                | 12.9 |
| 2–4 y                                                       | 52                                                                  | 6.4  | 249                                                                | 10.9 |
| 5–11 y                                                      | 97                                                                  | 11.9 | 470                                                                | 20.5 |
| 12–17 y                                                     | 547                                                                 | 67.3 | 829                                                                | 36.2 |
| Sex                                                         |                                                                     |      |                                                                    |      |
| Male                                                        | 332                                                                 | 40.8 | 1224                                                               | 53.4 |
| Female                                                      | 481                                                                 | 59.2 | 1069                                                               | 46.6 |
| Race and ethnicity group                                    |                                                                     |      |                                                                    |      |
| Hispanic                                                    | 278                                                                 | 34.2 | 773                                                                | 33.7 |
| NH White                                                    | 242                                                                 | 29.8 | 525                                                                | 22.9 |
| NH Black                                                    | 199                                                                 | 24.5 | 737                                                                | 32.1 |
| NH Asian or Pacific Islander                                | 31                                                                  | 3.8  | 118                                                                | 5.2  |
| NH other <sup>a</sup>                                       | 63                                                                  | 7.8  | 140                                                                | 6.1  |
| Housing type                                                |                                                                     |      |                                                                    |      |
| Private residence <sup>b</sup>                              | 699                                                                 | 86.0 | 2240                                                               | 28.0 |
| Congregate setting, other, or unknown <sup>c</sup>          | 114                                                                 | 14.0 | 53                                                                 | 2.3  |
| Underlying medical conditions                               |                                                                     |      |                                                                    |      |
| ≥1 underlying medical conditions                            | 299                                                                 | 36.8 | 1262                                                               | 55.0 |
| Obesity <sup>d</sup>                                        | 119                                                                 | 14.6 | 478                                                                | 20.9 |
| Chronic lung disease                                        | 87                                                                  | 10.7 | 468                                                                | 20.4 |
| Asthma                                                      | 78                                                                  | 9.6  | 373                                                                | 16.3 |
| Neurologic disorder                                         | 70                                                                  | 8.6  | 348                                                                | 15.2 |
| Developmental delay                                         | 46                                                                  | 5.7  | 218                                                                | 9.5  |
| Cardiovascular disease                                      | 24                                                                  | 3.0  | 146                                                                | 6.4  |
| Congenital heart disease                                    | 14                                                                  | 1.7  | 94                                                                 | 4.1  |
| Blood disorder                                              | 10                                                                  | 1.2  | 142                                                                | 6.2  |
| Sickle cell disease                                         | 6                                                                   | 0.7  | 102                                                                | 4.5  |
| Chronic metabolic disease                                   | 35                                                                  | 4.3  | 136                                                                | 5.9  |
| Diabetes mellitus (type I or II)                            | 13                                                                  | 1.6  | 89                                                                 | 3.9  |
| Immunocompromised condition                                 | 25                                                                  | 3.1  | 129                                                                | 5.6  |
| Feeding tube dependent                                      | 6                                                                   | 0.7  | 114                                                                | 5.0  |
| Premature <sup>e</sup>                                      | 19                                                                  | 2.3  | 100                                                                | 4.4  |
| Airway abnormality                                          | 3                                                                   | 0.4  | 58                                                                 | 2.5  |
| Other                                                       | 21                                                                  | 2.6  | 133                                                                | 5.8  |
| Renal disease                                               | 7                                                                   | 0.9  | 46                                                                 | 2.0  |
| Liver disease                                               | 6                                                                   | 0.7  | 41                                                                 | 1.8  |

**SUPPLEMENTAL TABLE 4** Continued

|                                                   | Pediatric Hospitalizations Excluded From Analysis ( <i>n</i> = 813) |      | Pediatric Hospitalizations Included in Analysis ( <i>n</i> = 2293) |      |
|---------------------------------------------------|---------------------------------------------------------------------|------|--------------------------------------------------------------------|------|
|                                                   | <i>n</i>                                                            | %    | <i>n</i>                                                           | %    |
| Rheumatologic, autoimmune, inflammatory condition | 2                                                                   | 0.3  | 14                                                                 | 0.6  |
| Discharge diagnosis of MIS-C                      | 4                                                                   | 0.5  | 198                                                                | 8.6  |
| <b>Outcomes</b>                                   |                                                                     |      |                                                                    |      |
| ICU admission or invasive mechanical ventilation  | 170                                                                 | 20.9 | 691                                                                | 30.1 |
| Invasive mechanical ventilation                   | 67                                                                  | 8.2  | 122                                                                | 5.3  |
| In-hospital deaths                                | 10                                                                  | 1.2  | 12                                                                 | 0.5  |

$\chi^2$  tests or Fisher's exact tests generated *P* values assessing the uniformity of the prevalence distributions by primary reason for admission. NH, non-Hispanic.

<sup>a</sup> Includes NH American Indian or Alaska Native (*n* = 21; 1.1%); NH multiple races (*n* = 20; 1.0%); or unknown (*n* = 77; 3.9%).

<sup>b</sup> Includes private residence or home with services.

<sup>c</sup> Includes hospitalized since birth, group home or retirement, homeless shelter, psychiatric facility, facility, long-term acute-care hospital, corrections facility, other, and unknown.

<sup>d</sup> Children aged 2 to 17 y were classified as having obesity if they had BMI (kg/m<sup>2</sup>)  $\geq$ 95th percentile for age and sex on the basis of CDC growth charts, ICD-10 codes for obesity in the electronic medical record, or obesity selected on the case report form.

<sup>e</sup> Gestational age <37 wk at birth among children <2 y.

**SUPPLEMENTAL TABLE 5** Underlying Medical Conditions Among Children <18 Years Hospitalized With SARS-CoV-2 Infection Identified Through the COVID-NET, March 2020 to January 2021

| Underlying Medical Conditions                           | Population     | Included Conditions                                                                                                                                                                                                                                                                                                                                                                                                                                                                                                                                                                                                                                                                                                                                                                                                                                                                                                                                                          |
|---------------------------------------------------------|----------------|------------------------------------------------------------------------------------------------------------------------------------------------------------------------------------------------------------------------------------------------------------------------------------------------------------------------------------------------------------------------------------------------------------------------------------------------------------------------------------------------------------------------------------------------------------------------------------------------------------------------------------------------------------------------------------------------------------------------------------------------------------------------------------------------------------------------------------------------------------------------------------------------------------------------------------------------------------------------------|
| Airway abnormality                                      | Children <18 y | Abnormality of airway (eg, tracheostomy and abnormalities of mouth or throat that affect ability to handle secretions: laryngomalacia, tracheomalacia, laryngotracheomalacia, subglottic stenosis, subglottic cyst, glottic web, subglottic hemangioma, vascular ring of trachea, congenital stridor, or vocal cord paralysis)                                                                                                                                                                                                                                                                                                                                                                                                                                                                                                                                                                                                                                               |
| Blood disorders, hemoglobinopathy underlying conditions | Children <18 y | <ul style="list-style-type: none"> <li>α thalassemia</li> <li>Aplastic anemia</li> <li>β thalassemia</li> <li>Coagulopathy</li> <li>Hemoglobin S-β thalassemia</li> <li>Leukopenia</li> <li>Myelodysplastic syndrome</li> <li>Neutropenia</li> <li>Pancytopenia</li> <li>Sickle cell disease</li> <li>Splenectomy or asplenia</li> <li>Thrombocytopenia</li> </ul>                                                                                                                                                                                                                                                                                                                                                                                                                                                                                                                                                                                                           |
| Cardiovascular disease                                  | Children <18 y | <ul style="list-style-type: none"> <li>Aortic, mitral, tricuspid, or pulmonic valve replacement</li> <li>Aortic stenosis</li> <li>Atrioventricular blocks</li> <li>Automated implantable devices, automatic implantable cardioverter-defibrillator, or pacemaker</li> <li>Bundle branch block (left bundle branch block or right bundle branch block)</li> <li>Cardiomyopathy</li> <li>Cerebral vascular accident, incident, or stroke, history of Congenital heart disease</li> <li>Coronary artery disease</li> <li>Deep vein thrombosis, history of</li> <li>Heart failure or congestive heart failure</li> <li>Myocardial infarction</li> <li>Mitral stenosis</li> <li>Pulmonary embolism</li> <li>Pulmonary hypertension, history of</li> <li>Pulmonary regurgitation</li> <li>Tricuspid regurgitation</li> <li>Ventricular fibrillation</li> <li>Ventricular tachycardia</li> <li>Other cardiovascular disease categorized on the basis of free-text review</li> </ul> |
| Chronic lung disease                                    | Children <18 y | <ul style="list-style-type: none"> <li>Active tuberculosis</li> <li>Asthma</li> <li>Bronchiectasis</li> <li>Bronchiolitis obliterans</li> <li>Chronic respiratory failure</li> <li>Cystic fibrosis</li> <li>Emphysema or chronic obstructive pulmonary disease</li> <li>Interstitial lung disease</li> <li>Obstructive sleep apnea</li> <li>Oxygen dependent</li> <li>Pulmonary fibrosis</li> <li>Restrictive lung disease</li> <li>Chronic lung disease of prematurity or bronchopulmonary dysplasia</li> </ul>                                                                                                                                                                                                                                                                                                                                                                                                                                                             |

**SUPPLEMENTAL TABLE 5** Continued

| Underlying Medical Conditions     | Population      | Included Conditions                                                                                                                                                                                                                                                                                                                                                                                                                                                                                                                                                                        |
|-----------------------------------|-----------------|--------------------------------------------------------------------------------------------------------------------------------------------------------------------------------------------------------------------------------------------------------------------------------------------------------------------------------------------------------------------------------------------------------------------------------------------------------------------------------------------------------------------------------------------------------------------------------------------|
| Chronic metabolic disease         | Children <18 y  | Other chronic lung disease categorized on the basis of free-text review<br>Adrenal disorders<br>Diabetes mellitus (type I or II)<br>Hyper- or hypo-function of pituitary gland<br>Inborn errors of metabolism<br>Metabolic syndrome<br>Parathyroid dysfunction<br>Thyroid dysfunction<br>Other chronic metabolic disease categorized on the basis of free-text review                                                                                                                                                                                                                      |
| Feeding tube dependent            | Children <18 y  | Feeding tube dependent                                                                                                                                                                                                                                                                                                                                                                                                                                                                                                                                                                     |
| Gastrointestinal or liver disease | Children <18 y  | Autoimmune hepatitis<br>Chronic pancreatitis<br>Cirrhosis or end stage liver disease<br>Crohn disease<br>Esophageal varices<br>Hepatitis B, chronic<br>Non-alcoholic fatty liver disease<br>Ulcerative colitis                                                                                                                                                                                                                                                                                                                                                                             |
| Immunocompromised condition       | Children <18 y  | Complement deficiency<br>Immunoglobulin deficiency or immunodeficiency<br>Immunosuppressive therapy (within the last 12 mo before admission)<br>Leukemia <sup>a</sup><br>Lymphoma, Hodgkin's, or Non-Hodgkin's <sup>a</sup><br>Metastatic cancer <sup>a</sup><br>Solid organ malignancy <sup>a</sup><br>Steroid therapy (within 2 wk of admission)<br>Transplant, hematopoietic stem cell (bone marrow transplant or peripheral stem cell transplant), history of<br>Transplant, solid organ, history of<br>Other immunocompromised condition categorized on the basis of free-text review |
| Neurologic disorder               | Children <18 y  | Cerebral palsy<br>Cognitive dysfunction<br>Developmental delay<br>Down syndrome or Trisomy 21<br>Epilepsy, seizure, or seizure disorder<br>Mitochondrial disorder<br>Muscular dystrophy<br>Neural tube defects or spina bifida<br>Neuropathy<br>Plegias, paralysis, or quadriplegia<br>Scoliosis or kyphoscoliosis<br>Traumatic brain injury, history of<br>Other neurologic disorder categorized on the basis of free-text review                                                                                                                                                         |
| Obesity                           | Children 2–17 y | BMI (kg/m <sup>2</sup> ) ≥95th percentile for age and sex on the basis of CDC growth charts, ICD-10 codes for obesity in the electronic medial chart, or obesity selected on COVID-NET the case report form                                                                                                                                                                                                                                                                                                                                                                                |
| Other underlying conditions       | Children <18 y  | Other free-text underlying medical conditions not categorized into a previous category after review by pediatrician                                                                                                                                                                                                                                                                                                                                                                                                                                                                        |
| Prematurity                       | Children <2 y   | Gestational age <37 wk at birth among children <2 y                                                                                                                                                                                                                                                                                                                                                                                                                                                                                                                                        |

**SUPPLEMENTAL TABLE 5** Continued

| Underlying Medical Conditions                        | Population     | Included Conditions                                                                                                                                                         |
|------------------------------------------------------|----------------|-----------------------------------------------------------------------------------------------------------------------------------------------------------------------------|
| Renal disease                                        | Children <18 y | Chronic kidney disease or chronic renal insufficiency<br>Dialysis<br>End stage renal disease<br>Glomerulonephritis<br>Nephrotic syndrome                                    |
| Rheumatologic, autoimmune, or inflammatory condition | Children <18 y | Juvenile idiopathic arthritis<br>Kawasaki disease<br>Systemic lupus erythematosus, lupus<br>Vasculitis, other<br>Other rheumatologic, autoimmune, or inflammatory disorders |

<sup>a</sup> Currently in treatment or diagnosed in previous 12 mo.

**SUPPLEMENTAL TABLE 6** Demographic Characteristics Associated With Severe Disease Among Children Hospitalized With COVID-19 Who Did Not Have a Discharge Diagnosis of MIS-C

|                                               | Severe Disease (n = 567) |      | No Severe Disease (n = 1528) |      | Bivariate Models |         |        | Multivariable Model |         |        |
|-----------------------------------------------|--------------------------|------|------------------------------|------|------------------|---------|--------|---------------------|---------|--------|
|                                               | n                        | %    | n                            | %    | RR               | 95% CI  | P      | aRR                 | 95% CI  | P      |
| Age group                                     |                          |      |                              |      |                  |         |        |                     |         |        |
| <6 mo                                         | 86                       | 15.2 | 361                          | 23.6 | 0.6              | 0.5–0.8 | .0004  | 0.8                 | 0.6–1.1 | .21    |
| 6–23 mo                                       | 70                       | 12.4 | 213                          | 13.9 | 0.8              | 0.6–1.1 | .16    | 1.0                 | 0.7–1.4 | .84    |
| 2–4 y                                         | 63                       | 11.1 | 150                          | 9.8  | 0.9              | 0.8–1.1 | .44    | 1.0                 | 0.8–1.2 | .89    |
| 5–11 y                                        | 105                      | 18.5 | 272                          | 17.8 | 0.9              | 0.8–1.0 | .07    | 0.9                 | 0.8–1.0 | .03    |
| 12–17 y                                       | 243                      | 42.9 | 532                          | 34.8 | Reference        | —       | —      | Reference           | —       | —      |
| Sex                                           |                          |      |                              |      |                  |         |        |                     |         |        |
| Male                                          | 313                      | 55.2 | 788                          | 51.6 | 1.1              | 0.9–1.4 | .27    | 1.1                 | 0.9–1.4 | .35    |
| Female                                        | 254                      | 44.8 | 740                          | 48.4 | Reference        | —       | —      | Reference           | —       | —      |
| Race and ethnicity group                      |                          |      |                              |      |                  |         |        |                     |         |        |
| Hispanic                                      | 175                      | 30.9 | 538                          | 35.2 | 1.0              | 0.7–1.4 | .77    | 0.9                 | 0.7–1.3 | .75    |
| NH Black                                      | 204                      | 36.0 | 447                          | 29.3 | 1.2              | 0.8–1.6 | .37    | 1.0                 | 0.7–1.5 | .87    |
| NH Asian or Pacific Islander                  | 26                       | 4.6  | 84                           | 5.5  | 0.9              | 0.6–1.3 | .66    | 1.0                 | 0.7–1.3 | .75    |
| NH other <sup>a</sup>                         | 37                       | 6.5  | 95                           | 6.2  | 1.2              | 0.9–1.5 | .21    | 1.2                 | 0.9–1.6 | .15    |
| NH White                                      | 125                      | 22.1 | 364                          | 23.8 | Reference        | —       | —      | Reference           | —       | —      |
| Residential type <sup>b</sup>                 |                          |      |                              |      |                  |         |        |                     |         |        |
| Congregate setting, other or unknown          | 21                       | 3.7  | 31                           | 2.0  | 1.5              | 1.1–2.3 | .02    | 1.5                 | 1.0–2.2 | .03    |
| Private residence                             | 546                      | 96.3 | 1497                         | 98.0 | Reference        | —       | —      | Reference           | —       | —      |
| ≥1 underlying medical conditions <sup>c</sup> |                          |      |                              |      |                  |         |        |                     |         |        |
| Yes                                           | 409                      | 72.1 | 777                          | 50.9 | 2.0              | 1.6–2.6 | <.0001 | 1.9                 | 1.5–2.6 | <.0001 |
| No                                            | 158                      | 27.9 | 751                          | 49.2 | Reference        | —       | —      | Reference           | —       | —      |

Multivariable generalized estimating equations modeling demographic characteristics and ≥1 underlying medical conditions associated with ICU admission or invasive mechanical ventilation among children ages <18 y hospitalized with SARS-CoV-2 infection who did not have a discharge diagnosis of MIS-C identified through the COVID-NET, March 2020 to May 2021. NH, non-Hispanic; —, not applicable.

<sup>a</sup> Includes non-Hispanic American Indian or Alaska Native, non-Hispanic multiple races, or unknown.

<sup>b</sup> Private residence includes home with services. Congregate setting includes hospitalized since birth, group home or retirement, homeless shelter, psychiatric facility, facility, long-term acute-care hospital, corrections facility, other, and unknown

<sup>c</sup> Includes obesity (among ages 2 to 17 y); prematurity (among ages <2 y); chronic lung disease; airway abnormality; neurologic disorders; immunocompromised conditions; feeding tube dependence; cardiovascular disease; chronic metabolic disease; blood disorders; gastrointestinal/liver disease; renal disease; rheumatologic, autoimmune, or inflammatory conditions; or other conditions.

**SUPPLEMENTAL TABLE 7** Underlying Medical Conditions Associated With Severe Disease Among Children Ages <18 Years Hospitalized With COVID-19 Who Did Not Have a Discharge Diagnosis of MIS-C

|                                         | Severe Disease |      | No Severe Disease |      | Bivariate Models |         |          |     | Multivariable Models |          |
|-----------------------------------------|----------------|------|-------------------|------|------------------|---------|----------|-----|----------------------|----------|
|                                         | <i>n</i>       | %    | <i>n</i>          | %    | RR               | 95% CI  | <i>P</i> | aRR | 95% CI               | <i>P</i> |
| Infants and children <2 y without MIS-C | 156            | 21.4 | 574               | 78.6 | —                | —       | —        | —   | —                    | —        |
| Chronic lung disease                    | 21             | 13.5 | 17                | 3.0  | 2.9              | 2.1–4.0 | <.0001   | 2.2 | 1.1–4.3              | .02      |
| Neurologic disorder                     | 27             | 17.3 | 22                | 3.8  | 3.0              | 2.3–3.9 | <.0001   | 2.1 | 1.5–2.9              | <.0001   |
| Cardiovascular disease                  | 22             | 14.1 | 34                | 5.9  | 2.0              | 1.5–2.7 | <.0001   | 1.6 | 1.1–2.3              | .007     |
| Airway abnormality                      | 12             | 7.7  | 12                | 2.1  | 2.5              | 1.4–4.3 | .001     | 1.6 | 1.1–2.3              | .02      |
| Prematurity <sup>a</sup>                | 38             | 24.4 | 61                | 10.6 | 2.1              | 1.5–3.0 | <.0001   | 1.6 | 1.3–2.1              | <.0001   |
| Feeding tube dependent                  | 11             | 7.1  | 22                | 3.8  | 1.6              | 1.0–2.7 | .04      | 0.4 | 0.2–0.8              | .02      |
| Other <sup>b</sup>                      | 11             | 7.1  | 25                | 4.4  | 1.5              | 0.8–2.7 | .19      | 1.1 | 0.6–2.0              | .89      |
| Children 2–17 y without MIS-C           | 411            | 30.1 | 954               | 69.9 | —                | —       | —        | —   | —                    | —        |
| Diabetes mellitus (type I or II)        | 52             | 12.7 | 35                | 3.6  | 2.2              | 1.9–2.6 | <.0001   | 2.4 | 2.0–2.8              | <.0001   |
| Feeding tube dependent                  | 49             | 11.9 | 30                | 3.1  | 2.3              | 2.0–2.7 | <.0001   | 2.2 | 1.7–2.9              | <.0001   |
| Chronic lung disease <sup>d</sup>       | 32             | 7.8  | 38                | 4.0  | 1.7              | 1.3–2.2 | .0001    | 1.2 | 0.9–1.6              | .14      |
| Obesity <sup>c</sup>                    | 154            | 37.5 | 276               | 28.9 | 1.3              | 1.1–1.6 | .002     | 1.3 | 1.1–1.5              | .002     |
| Developmental delay                     | 80             | 19.5 | 103               | 10.8 | 1.6              | 1.5–1.8 | <.0001   | 1.3 | 1.1–1.6              | .004     |
| Chronic metabolic disease <sup>d</sup>  | 12             | 2.9  | 28                | 2.9  | 1.0              | 0.6–1.7 | .91      | 0.9 | 0.6–1.4              | .61      |
| Asthma                                  | 105            | 25.6 | 231               | 24.2 | 1.1              | 0.8–1.4 | .66      | 1.1 | 0.8–1.4              | .70      |
| Airway abnormality                      | 18             | 4.4  | 16                | 1.7  | 1.8              | 1.3–2.7 | .002     | 1.0 | 0.7–1.5              | .99      |
| Immunocompromised condition             | 37             | 9.0  | 85                | 8.9  | 1.0              | 0.7–1.4 | .98      | 1.3 | 0.9–1.9              | .17      |
| Cardiovascular disease                  | 30             | 7.3  | 53                | 5.6  | 1.3              | 0.9–1.8 | .19      | 1.1 | 0.8–1.5              | .46      |
| Neurologic disorder <sup>d</sup>        | 33             | 8.0  | 63                | 6.6  | 1.2              | 0.9–1.6 | .28      | 1.1 | 0.8–1.4              | .59      |
| Blood disorder                          | 24             | 5.8  | 95                | 10.0 | 0.6              | 0.4–0.7 | <.0001   | 0.6 | 0.4–0.8              | .002     |
| Other <sup>e</sup>                      | 14             | 3.4  | 76                | 8.0  | 0.5              | 0.3–0.7 | <.0001   | 0.4 | 0.3–0.6              | <.0001   |

Multivariable generalized estimating equations modeling underlying medical conditions associated with ICU admission or invasive mechanical ventilation among children ages <18 y hospitalized with COVID-19 who did not have a discharge diagnosis of MIS-C identified through the COVID-NET, March 2020 to May 2021. Estimates are adjusted for age group, sex, race and ethnicity group, and housing type. —, not applicable.

<sup>a</sup> Born <37 wk gestational age.

<sup>b</sup> Includes immunocompromised conditions, liver disease, chronic metabolic disease, blood disorders, renal disease, and other disease specified on the case report form.

<sup>c</sup> Children ages 2 to 17 y were classified as having obesity if they had BMI (kg/m<sup>2</sup>) ≥95th percentile for age and sex based on CDC growth charts, ICD-10 codes for obesity in the electronic medical record, or obesity selected on the COVID-NET case report form.

<sup>d</sup> Chronic lung disease excludes asthma, chronic metabolic disease excludes type 1 or 2 diabetes mellitus, and neurologic disorder excludes developmental delay.

<sup>e</sup> Includes liver disease; renal disease; rheumatologic, autoimmune, and inflammatory conditions; and other conditions specified on the case report form.

**SUPPLEMENTAL TABLE 8** Underlying Conditions Associated With Severe COVID-19 by Additional Age Groups

|                                        | Severe Disease |      | No Severe Disease |      | Bivariate Models |         |          | Multivariable Model |         |          |
|----------------------------------------|----------------|------|-------------------|------|------------------|---------|----------|---------------------|---------|----------|
|                                        | <i>n</i>       | %    | <i>n</i>          | %    | RR               | 95% CI  | <i>P</i> | aRR                 | 95% CI  | <i>P</i> |
| <6 mo                                  | 88             | 19.6 | 362               | 80.4 | —                | —       | —        | —                   | —       | —        |
| Prematurity <sup>a</sup>               | 25             | 28.4 | 34                | 9.4  | 2.6              | 1.8–3.8 | <.0001   | 2.4                 | 1.7–3.5 | <.0001   |
| Cardiovascular disease                 | 8              | 9.1  | 10                | 2.8  | 2.4              | 1.5–3.9 | .0004    | 2.4                 | 1.3–4.3 | .005     |
| Other <sup>b</sup>                     | 10             | 11.4 | 22                | 6.1  | 1.7              | 1.2–2.3 | .002     | 1.2                 | 1.0–1.4 | .03      |
| 6–23 mo                                | 76             | 25.8 | 219               | 74.2 | —                | —       | —        | —                   | —       | —        |
| Chronic lung disease <sup>d</sup>      | 17             | 22.4 | 13                | 5.9  | 2.7              | 1.7–4.2 | <.0001   | 2.4                 | 1.3–4.2 | .004     |
| Neurologic disorders <sup>d</sup>      | 25             | 32.9 | 20                | 9.1  | 2.7              | 2.4–3.2 | <.0001   | 2.3                 | 1.8–2.9 | <.0001   |
| Abnormality of airway                  | 9              | 11.8 | 8                 | 3.7  | 2.2              | 1.2–4.2 | .02      | 1.5                 | 0.8–2.9 | .22      |
| Cardiovascular disease                 | 15             | 19.7 | 24                | 11.0 | 1.6              | 1.4–2.0 | <.0001   | 1.4                 | 1.2–1.5 | <.0001   |
| Prematurity <sup>a</sup>               | 14             | 18.4 | 27                | 12.3 | 1.4              | 0.6–3.2 | .41      | 1.0                 | 0.5–1.8 | .91      |
| Feeding tube dependence                | 9              | 11.8 | 17                | 7.8  | 1.4              | 1.0–2.0 | .04      | 0.5                 | 0.1–1.6 | .23      |
| Other <sup>b</sup>                     | 10             | 13.2 | 29                | 13.2 | 1.0              | 0.5–2.0 | .08      | 0.9                 | 0.4–2.0 | .80      |
| 2–4 y                                  | 80             | 32.1 | 169               | 67.9 | —                | —       | —        | —                   | —       | —        |
| Feeding tube dependence                | 18             | 22.5 | 8                 | 4.7  | 2.5              | 1.1–5.7 | .02      | 2.1                 | 1.1–3.9 | .02      |
| Obesity <sup>c</sup>                   | 16             | 20.0 | 23                | 13.6 | 1.4              | 0.8–2.5 | .19      | 1.4                 | 0.9–2.0 | .13      |
| Neurologic disorder <sup>d</sup>       | 30             | 37.5 | 37                | 21.9 | 1.8              | 1.1–2.9 | .02      | 1.4                 | 1.0–1.9 | .06      |
| Chronic lung disease <sup>d</sup>      | 19             | 23.8 | 22                | 13.0 | 1.7              | 0.9–3.1 | .08      | 1.3                 | 0.9–1.7 | .18      |
| Chronic metabolic disease <sup>d</sup> | 10             | 12.5 | 8                 | 4.7  | 1.9              | 1.7–2.0 | <.0001   | 1.3                 | 1.1–1.5 | .006     |
| Cardiovascular disease                 | 7              | 8.8  | 11                | 6.5  | 1.5              | 0.9–2.5 | 0.14     | 0.8                 | 0.6–1.1 | .13      |
| Other <sup>b</sup>                     | 13             | 16.3 | 33                | 19.5 | 0.7              | 0.7–0.8 | <.0001   | 0.6                 | 0.5–0.7 | <.0001   |
| 5–11 y                                 | 166            | 35.3 | 304               | 64.7 | —                | —       | —        | —                   | —       | —        |
| Chronic metabolic disease <sup>d</sup> | 10             | 6.0  | 14                | 4.6  | 1.3              | 1.0–1.8 | .10      | 1.4                 | 0.9–2.1 | .10      |
| Obesity <sup>c</sup>                   | 52             | 31.3 | 71                | 23.4 | 1.3              | 1.2–1.5 | <.0001   | 1.4                 | 1.2–1.6 | <.0001   |
| Feeding tube dependence                | 10             | 6.0  | 17                | 6.0  | 1.1              | 0.8–1.5 | .48      | 1.3                 | 1.0–1.7 | .06      |
| Neurologic disorder <sup>d</sup>       | 37             | 22.3 | 64                | 21.1 | 1.1              | 0.9–1.3 | .27      | 1.1                 | 0.9–1.3 | .41      |
| Chronic lung disease <sup>d</sup>      | 42             | 25.3 | 95                | 31.3 | 0.8              | 0.7–0.9 | .0001    | 0.8                 | 0.7–1.0 | .09      |
| Cardiovascular disease                 | 7              | 4.2  | 22                | 7.2  | 0.7              | 0.4–1.1 | .13      | 0.8                 | 0.4–1.3 | .32      |
| Immunocompromised condition            | 7              | 4.2  | 32                | 10.5 | 0.5              | 0.3–0.7 | .0002    | 0.5                 | 0.4–0.8 | .003     |
| Blood disorder                         | 9              | 5.4  | 32                | 10.5 | 0.5              | 0.4–0.8 | .001     | 0.6                 | 0.3–1.0 | .05      |
| Other <sup>b</sup>                     | 6              | 3.6  | 25                | 8.2  | 0.6              | 0.4–0.8 | .0006    | 0.6                 | 0.4–0.7 | <.0001   |
| 12–17 y                                | 281            | 33.9 | 548               | 66.1 | —                | —       | —        | —                   | —       | —        |
| Feeding tube dependence                | 21             | 7.5  | 7                 | 1.3  | 2.4              | 2.1–2.8 | <.0001   | 3.0                 | 2.6–3.5 | <.0001   |
| Chronic metabolic disease <sup>d</sup> | 45             | 16.0 | 41                | 7.5  | 1.7              | 1.5–1.9 | <.0001   | 1.7                 | 1.5–1.9 | <.0001   |
| Immunocompromised conditions           | 26             | 9.3  | 38                | 6.9  | 1.2              | 0.9–1.7 | .18      | 1.4                 | 1.0–2.1 | .05      |
| Obesity <sup>c</sup>                   | 123            | 43.8 | 193               | 35.2 | 1.3              | 1.0–1.6 | .03      | 1.3                 | 1.0–1.6 | .04      |
| Cardiovascular disease                 | 18             | 6.4  | 24                | 4.4  | 1.3              | 0.7–2.5 | .40      | 1.2                 | 0.6–2.4 | .63      |
| Chronic lung disease <sup>d</sup>      | 91             | 32.4 | 161               | 29.4 | 1.1              | 0.9–1.3 | .20      | 1.0                 | 0.9–1.2 | .61      |
| Neurologic disorder <sup>d</sup>       | 56             | 19.9 | 75                | 13.7 | 1.4              | 1.2–1.6 | <.0001   | 1.0                 | 0.9–1.0 | .33      |
| Blood disorder                         | 11             | 3.9  | 50                | 9.1  | 0.4              | 0.4–0.6 | <.0001   | 0.4                 | 0.3–0.6 | <.0001   |
| Other <sup>b</sup>                     | 21             | 7.5  | 53                | 9.7  | 0.8              | 0.6–1.2 | .29      | 0.6                 | 0.4–0.8 | .001     |

Multivariable generalized estimating equations modeling underlying medical conditions associated with ICU admission or invasive mechanical ventilation by additional age groups among children ages <18 y hospitalized with COVID-19 identified through COVID-NET, March 2020 to May 2021. Estimates are adjusted for sex and race and ethnicity group. —, not applicable.

<sup>a</sup> Born <37 wk gestational age

<sup>b</sup> Includes liver disease; renal disease; and rheumatologic, autoimmune, and inflammatory conditions; and other conditions specified on the case report form. Additionally, among children aged <6 mo, chronic metabolic disease, immunocompromised conditions, chronic lung disease, neurologic disorders, airway abnormalities, feeding tube dependence, and blood disorders are included. Among children aged 6 to 23 mo, chronic metabolic disease, immunocompromised conditions, and blood disorders are included. Among children aged 2 to 4 y, blood disorders, immunocompromised conditions, and airway abnormalities are included. Among children aged 5 to 11 y and 12 to 17 y, airway abnormalities are included.

<sup>c</sup> Children ages 2 to 17 y were classified as having obesity if they had BMI (kg/m<sup>2</sup>) ≥95th percentile for age and sex based on CDC growth charts, ICD-10 codes for obesity in the electronic medical record, or obesity selected on the COVID-NET case report form.

<sup>d</sup> Chronic lung disease includes asthma, neurologic disorders include developmental delay, and chronic metabolic disease includes type I or II diabetes mellitus.

**SUPPLEMENTAL TABLE 9** Underlying Conditions Associated With Severe Disease Among Children Ages 2–17 Years Hospitalized With COVID-19 by Race and Ethnicity Group

| Underlying Medical Condition            | Severe Disease |      | No Severe Disease |      | Bivariate Models |         |          | Multivariable Models <sup>a</sup> |         |          |
|-----------------------------------------|----------------|------|-------------------|------|------------------|---------|----------|-----------------------------------|---------|----------|
|                                         | <i>n</i>       | %    | <i>n</i>          | %    | RR               | 95% CI  | <i>P</i> | aRR                               | 95% CI  | <i>P</i> |
| Hispanic children ages 2–17 y           | 162            | 32.0 | 344               | 68.0 | —                | —       | —        | —                                 | —       | —        |
| Chronic metabolic disease <sup>b</sup>  | 19             | 11.7 | 19                | 5.5  | 1.7              | 1.2–2.2 | .0014    | 1.6                               | 1.1–2.5 | .03      |
| Neurologic disorder <sup>b</sup>        | 37             | 22.8 | 54                | 15.7 | 1.3              | 1.0–1.8 | .04      | 1.3                               | 1.0–1.8 | .05      |
| Obesity <sup>c</sup>                    | 73             | 45.1 | 119               | 34.6 | 1.4              | 1.1–1.8 | .01      | 1.4                               | 1.0–1.8 | .03      |
| Chronic lung disease <sup>b</sup>       | 43             | 26.5 | 79                | 23.0 | 1.1              | 0.8–1.5 | .71      | 1.0                               | 0.8–1.3 | .85      |
| Cardiovascular disease                  | 11             | 6.8  | 22                | 6.4  | 1.0              | 0.7–1.6 | .90      | 0.9                               | 0.7–1.2 | .47      |
| Immunocompromised condition             | 12             | 7.4  | 35                | 10.2 | 0.9              | 0.8–1.0 | .02      | 0.9                               | 0.7–1.0 | .13      |
| Other <sup>d</sup>                      | 24             | 14.8 | 49                | 14.2 | 1.0              | 0.8–1.2 | .90      | 1.0                               | 0.8–1.2 | .90      |
| Non-Hispanic Black children ages 2–17 y | 216            | 39.6 | 329               | 60.4 | —                | —       | —        | —                                 | —       | —        |
| Feeding tube dependence                 | 17             | 7.9  | 13                | 4.0  | 1.5              | 1.3–1.9 | <.0001   | 1.5                               | 1.0–2.3 | .06      |
| Obesity <sup>c</sup>                    | 75             | 32.7 | 87                | 26.4 | 1.3              | 1.1–1.5 | .003     | 1.2                               | 1.0–1.4 | .01      |
| Cardiovascular disease                  | 14             | 6.5  | 17                | 5.2  | 1.2              | 0.9–1.6 | .34      | 1.1                               | 1.1–1.1 | <.0001   |
| Neurologic disorder <sup>b</sup>        | 47             | 21.8 | 57                | 17.3 | 1.2              | 1.0–1.5 | .12      | 1.0                               | 0.6–1.7 | .93      |
| Chronic lung disease <sup>b</sup>       | 67             | 31.0 | 118               | 35.9 | 0.9              | 0.7–1.1 | .23      | 0.9                               | 0.7–1.1 | .21      |
| Immunocompromised condition             | 10             | 4.6  | 25                | 7.6  | 0.7              | 0.4–1.4 | .31      | 0.9                               | 0.5–1.5 | .60      |
| Chronic metabolic disease <sup>b</sup>  | 25             | 11.6 | 21                | 6.4  | 1.5              | 1.3–1.7 | <.0001   | 0.8                               | 0.5–1.2 | .24      |
| Blood disorder                          | 17             | 7.9  | 69                | 21.0 | 0.4              | 0.3–0.5 | <.0001   | 0.5                               | 0.3–0.6 | <.0001   |
| Other <sup>d</sup>                      | 19             | 8.8  | 31                | 9.4  | 0.9              | 0.6–1.4 | .76      | 0.8                               | 0.5–1.2 | .24      |
| Non-Hispanic White children ages 2–17 y | 97             | 28.2 | 247               | 71.8 | —                | —       | —        | —                                 | —       | —        |
| Chronic metabolic disease <sup>b</sup>  | 11             | 11.3 | 18                | 7.3  | 1.5              | 1.3–1.8 | <.0001   | 1.6                               | 1.1–2.3 | .01      |
| Obesity <sup>c</sup>                    | 27             | 27.8 | 50                | 29.2 | 1.5              | 1.0–2.3 | .06      | 1.5                               | 1.0–2.2 | .04      |
| Feeding tube dependence                 | 10             | 10.3 | 10                | 4.1  | 1.8              | 1.6–2.0 | <.0001   | 2.1                               | 1.3–3.3 | .002     |
| Chronic lung disease <sup>b</sup>       | 29             | 29.9 | 53                | 21.5 | 1.4              | 1.2–1.7 | .0002    | 1.2                               | 0.9–1.5 | .23      |
| Neurologic disorder <sup>b</sup>        | 23             | 23.7 | 46                | 18.6 | 1.3              | 1.0–1.7 | .08      | 1.1                               | 0.6–2.0 | .79      |
| Immunocompromised condition             | 9              | 9.3  | 20                | 8.1  | 1.2              | 0.7–2.0 | .49      | 1.2                               | 0.7–2.2 | .52      |
| Other <sup>d</sup>                      | 10             | 10.3 | 37                | 15.0 | 0.8              | 0.6–1.0 | .02      | 0.6                               | 0.5–0.7 | <.0001   |

Multivariable generalized estimating equations modeling underlying medical conditions associated with ICU admission or invasive mechanical ventilation by race and ethnicity group among children ages <18 y hospitalized with COVID-19 identified through the COVID-NET, March 2020–May 2021. Estimates are adjusted for age group and sex. —, not applicable.

<sup>a</sup> Multivariable models are adjusted for age group, sex, race and/or Hispanic ethnicity group, and housing type.

<sup>b</sup> Chronic lung disease includes asthma, neurologic disorders include developmental delay, and chronic metabolic disease includes type I or II diabetes mellitus.

<sup>c</sup> Children 2 to 17 y were classified as having obesity if they had BMI (kg/m<sup>2</sup>) ≥95th percentile for age and sex based on CDC growth charts, ICD-10 codes for obesity in the electronic medical record, or obesity selected on the COVID-NET case report form.

<sup>d</sup> Includes airway abnormalities, liver disease; renal disease; rheumatologic, autoimmune, and inflammatory conditions; and other conditions specified on the case report form. Feeding tube dependence and blood disorders are also included for Hispanic children and cardiovascular disease and blood disorders are also included for non-Hispanic White children.
